# Supplementary material
Source: Springer Nature journal article supplement (https://www.springermedizin.de/resource/supplementary/13012_2008_160_MOESM3_ESM.pdf/9629366)

# ABSORPTIVE CAPACITY

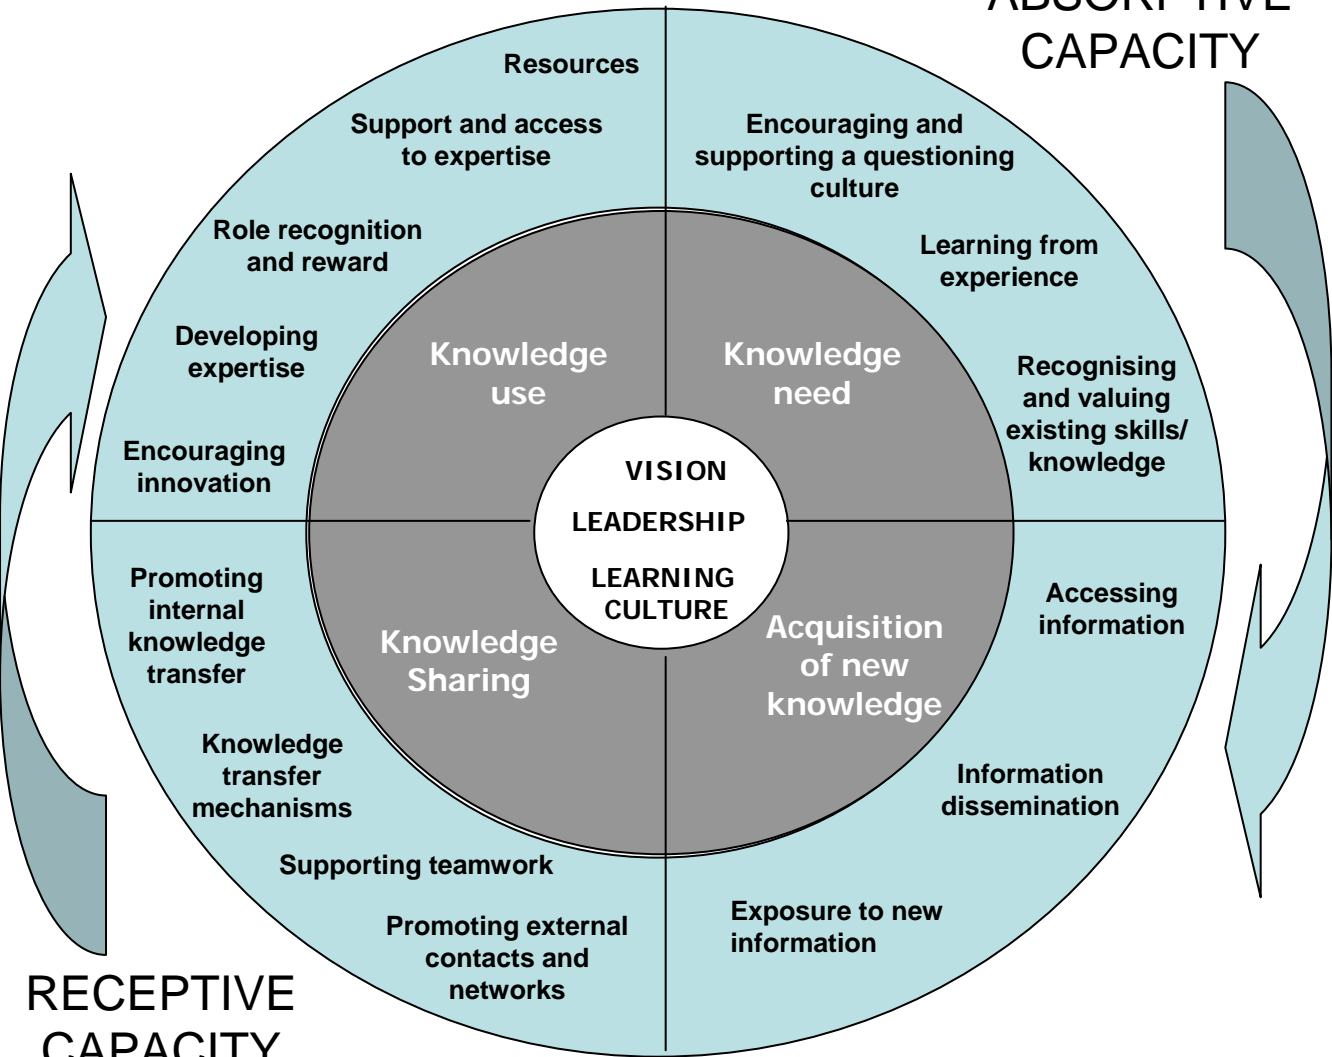

# RECEPTIVE CAPACITY

Supplement: MOESM3 [file 9629366]
